# Supplementary material for: Effects of Prebiotic Yeast Mannan on Gut Health and Sleep Quality in Healthy Adults: A Randomized, Double-Blind, Placebo-Controlled Study
Source: MDPI journal article supplement (doi:10.3390/nu16010141), 2023-12-31
Supplement: s1 [file s1]

## Supplementary Information

### Title

#### Effects of Prebiotic Yeast Mannan on Gut Health and Sleep Quality in Healthy Adults: A Randomized, Double-Blind, Placebo-Controlled Study

Reiko Tanihiro <sup>1,\*</sup>, Masahiro Yuki <sup>1</sup>, Masaki Sasai <sup>1</sup>, Akane Haseda<sup>2</sup>, Hiroyo Kagami-Katsuyama<sup>2</sup>, Tatsuhiko Hirota <sup>1</sup>, Naoyuki Honma <sup>2</sup>, and Jun Nishihira <sup>2</sup>

<sup>1</sup> Core Technology Laboratories, Asahi Quality and Innovations, Ltd., Moriya 302-0106, Japan; masahiro.yuki@asahi-qi.co.jp (M.Y.); masaki.sasai@asahi-qi.co.jp (M.S.); tatsuhiko.hirota@asahi-qi.co.jp (T.H.)

<sup>2</sup> Department of Medical Management and Informatics, Hokkaido Information University, Ebetsu 069-8585, Japan; nishihira@do-johodai.ac.jp

\*Correspondence: reiko.tanihiro@asahi-qi.co.jp; Tel.: +81-297-46-9347

**Table S1.** Participant inclusion and exclusion criteria.

| <b>Inclusion criteria</b> |                                                                                                                                                                                           |
|---------------------------|-------------------------------------------------------------------------------------------------------------------------------------------------------------------------------------------|
| 1                         | Participants who agreed to participate in this study with written informed consent                                                                                                        |
| 2                         | Participants with discomfort in defecation                                                                                                                                                |
| <b>Exclusion criteria</b> |                                                                                                                                                                                           |
| 1                         | Participants with previous or current history of gastrointestinal cancer                                                                                                                  |
| 2                         | Participants with gastrointestinal disorders                                                                                                                                              |
| 3                         | Participants who use gastrointestinal drugs or female hormone once or more a week                                                                                                         |
| 4                         | Participants suffering from serious cerebrovascular, cardiac, renal, hepatic diseases or infectious diseases requiring reporting to the authorities                                       |
| 5                         | Participants with a history of major surgery to the digestive system                                                                                                                      |
| 6                         | Participants with significant abnormalities in blood pressure measurements                                                                                                                |
| 7                         | Participants with severe anemia                                                                                                                                                           |
| 8                         | Menopausal women with significant changes in physical condition                                                                                                                           |
| 9                         | Participants who repeat constipation and diarrhea                                                                                                                                         |
| 10                        | Participants with defecation frequency of 3 or less/ 9 or more per week                                                                                                                   |
| 11                        | Participants with stool characteristics (Bristol Stool Scale, BSS) of 5 or more                                                                                                           |
| 12                        | Participants who have a habit of consuming yogurt 6 days or more per week                                                                                                                 |
| 13                        | Participants who have a habit of consuming beverages that include lactic acid bacteria and/or bifidobacteria 2 days or more per week                                                      |
| 14                        | participants who have a habit of consuming beverages that include dietary fiber reinforced food and/or oligo sugar 1 day or more per week                                                 |
| 15                        | Participants allergic to drugs or foods, especially yeast                                                                                                                                 |
| 16                        | Participants who used antibiotics within 12 weeks prior to this study                                                                                                                     |
| 17                        | Alcohol abusers, heavy smokers, or participants with extremely irregular lifestyles                                                                                                       |
| 18                        | Participants who donated either 400 mL of whole blood within 12 weeks (men), 16 weeks (women), 200 mL of whole blood within 4 weeks, or blood components within 2 weeks before this study |
| 19                        | Pregnant or possibly pregnant or lactating women                                                                                                                                          |
| 20                        | Participants scheduled to participate in another clinical trial between 4 weeks prior to the screening test and the end of intake                                                         |
| 21                        | Any other participants deemed ineligible by the study investigator                                                                                                                        |

**Table S2.** qPCR amplification conditions.

| <b>Target species</b>      | <b>Primer-F<br/>Primer-R (5' to 3')<br/>Probe (5' FAM - 3' TAMRA)</b> | <b>Strains for<br/>standard curves</b>   | <b>PCR amplification<br/>condition</b>                                                 | <b>Ref.</b> |
|----------------------------|-----------------------------------------------------------------------|------------------------------------------|----------------------------------------------------------------------------------------|-------------|
| All eubacteria             | CGGTGAATACGTTCCCGG<br>TACGGCTACCTTGTTACGACTT                          | <i>B. fragilis</i><br>ATCC 25285         | 95 °C for 10 s,<br>[95 °C for 20 s, 56 °C for 20 s,<br>and 72 °C for 30 s] × 40 cycles | 29          |
| <i>B. thetaiotaomicron</i> | GCAAACTGGAGATGGCGA<br>AAGGTTTGGTGAGCCGTTA<br>TCGATGGGGATGCGTTCCATTAGG | <i>B. thetaiotaomicron</i><br>ATCC 29741 | 95 °C for 30 s,<br>[95 °C for 15 s and 62.5 °C for 60 s]<br>× 40 cycles                | 28          |

**Table S3.** Bowel habits.

| Parameters (Unit)                | Placebo       |                |              | YM            |                |             | <i>p</i> -values <sup>1</sup> |
|----------------------------------|---------------|----------------|--------------|---------------|----------------|-------------|-------------------------------|
|                                  | Pre-treatment | Post-treatment | Changes      | Pre-treatment | Post-treatment | Changes     |                               |
| Defecation frequency (times/day) | 0.81 ± 0.05   | 0.83 ± 0.05    | 0.02 ± 0.05  | 0.75 ± 0.06   | 0.96 ± 0.06    | 0.21 ± 0.06 | 0.037*                        |
| Defecation volume (units/day)    | 5.27 ± 0.27   | 4.86 ± 0.33    | -0.41 ± 0.33 | 4.86 ± 0.40   | 5.74 ± 0.30    | 0.88 ± 0.30 | 0.013*                        |
| Bristol stool scale              | 3.61 ± 0.10   | 4.01 ± 0.11    | 0.40 ± 0.11  | 3.45 ± 0.15   | 3.57 ± 0.11    | 0.12 ± 0.11 | 0.096                         |

Values are presented as the means ± SE. <sup>1</sup>*p*-values indicate a comparison of changes from pre-treatment between groups by Student's *t*-test (\**p* < 0.05).

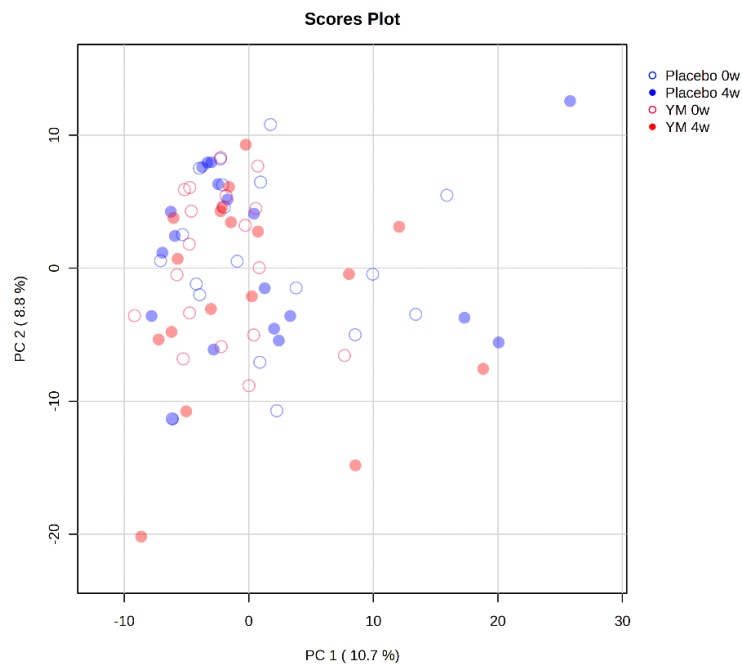

**Figure S1.** PCA plot of all samples. The YM group is depicted in red, and the placebo group in blue. Open circles represent the pre-treatment condition for each group (YM 0w, placebo 0w), and closed circles represent the post-treatment condition for each group (YM 4w, placebo 4w).

**Table S4.** Significant differential metabolites between the groups.

| Metabolites                             | HMDB ID     | PubChem<br>CID | VIP  | <i>p</i> -values | Changes |
|-----------------------------------------|-------------|----------------|------|------------------|---------|
| 2-deoxyribose 1-phosphate (2dR1P)       | HMDB0001351 | 5460448        | 1.91 | 0.048            | ↓       |
| Castanospermine                         | HMDB0249700 | 54445          | 2.10 | 0.028            | ↓       |
| <i>N</i> -Acetylmethionine              | HMDB0003357 | 439232         | 1.95 | 0.043            | ↓       |
| Cyprodinil                              | HMDB0034853 | 86367          | 2.26 | 0.018            | ↓       |
| Methylguanidine                         | HMDB0001522 | 10111          | 2.25 | 0.018            | ↓       |
| Prostaglandin E <sub>2</sub>            | HMDB0001220 | 5280360        | 2.44 | 0.010            | ↓       |
| Shikimate                               | HMDB0003070 | 8742           | 2.07 | 0.031            | ↓       |
| Deoxyadenosine monophosphate (dAMP)     | HMDB0000905 | 12599          | 2.29 | 0.016            | ↑       |
| Deoxycytidine monophosphate (dCMP)      | HMDB0001202 | 13945          | 2.20 | 0.021            | ↑       |
| Deoxythymidine monophosphate (dTMP)     | HMDB0001227 | 9700           | 1.98 | 0.040            | ↑       |
| Trimethylamine                          | HMDB0000906 | 1146           | 1.97 | 0.041            | ↑       |
| Gamma-aminobutyric acid (GABA)          | HMDB0000112 | 119            | 2.12 | 0.027            | ↑       |
| Taurine                                 | HMDB0000251 | 1123           | 1.96 | 0.041            | ↑       |
| Propionate                              | HMDB0000237 | 1032           | 2.13 | 0.026            | ↑       |
| <i>N</i> <sup>1</sup> -Acetylspermidine | HMDB0001276 | 496            | 2.42 | 0.011            | ↑       |
| <i>S</i> -Adenosylmethionine (SAM)      | HMDB0001185 | 34755          | 2.31 | 0.015            | ↑       |
| Creatinine                              | HMDB0000562 | 588            | 2.40 | 0.011            | ↑       |
| Mannosamine                             |             | 440049         | 2.04 | 0.033            | ↑       |
| Cystine                                 | HMDB0000192 | 595            | 2.50 | 0.008            | ↑       |
| Glycyl-glycine (Gly-Gly)                | HMDB0011733 | 11163          | 2.31 | 0.015            | ↑       |

HMDB, Human Metabolome Database; VIP, VIP values for the first component of PLS-DA. The *p*-values were calculated using Student's *t*-test. An upward arrow (↑) indicates an increase in the YM group compared to the placebo group. A downward arrow (↓) indicates a decrease in the YM group compared to the placebo group.
